# Supplementary material
Source: HighWire-hosted journal article supplement (https://www.canjsurg.ca/highwire/filestream/98143/field_highwire_adjunct_files/0/CJS-011521-at-1.pdf)
Supplement: CJS-011521-at-1.pdf [file CJS-011521-at-1.pdf]

## COVID-19 and the duration of operating room procedures in Ontario: A population-based retrospective study – Appendix

**Figure A1. Unadjusted Average Procedure Duration, March 1 to March 31, 2020**

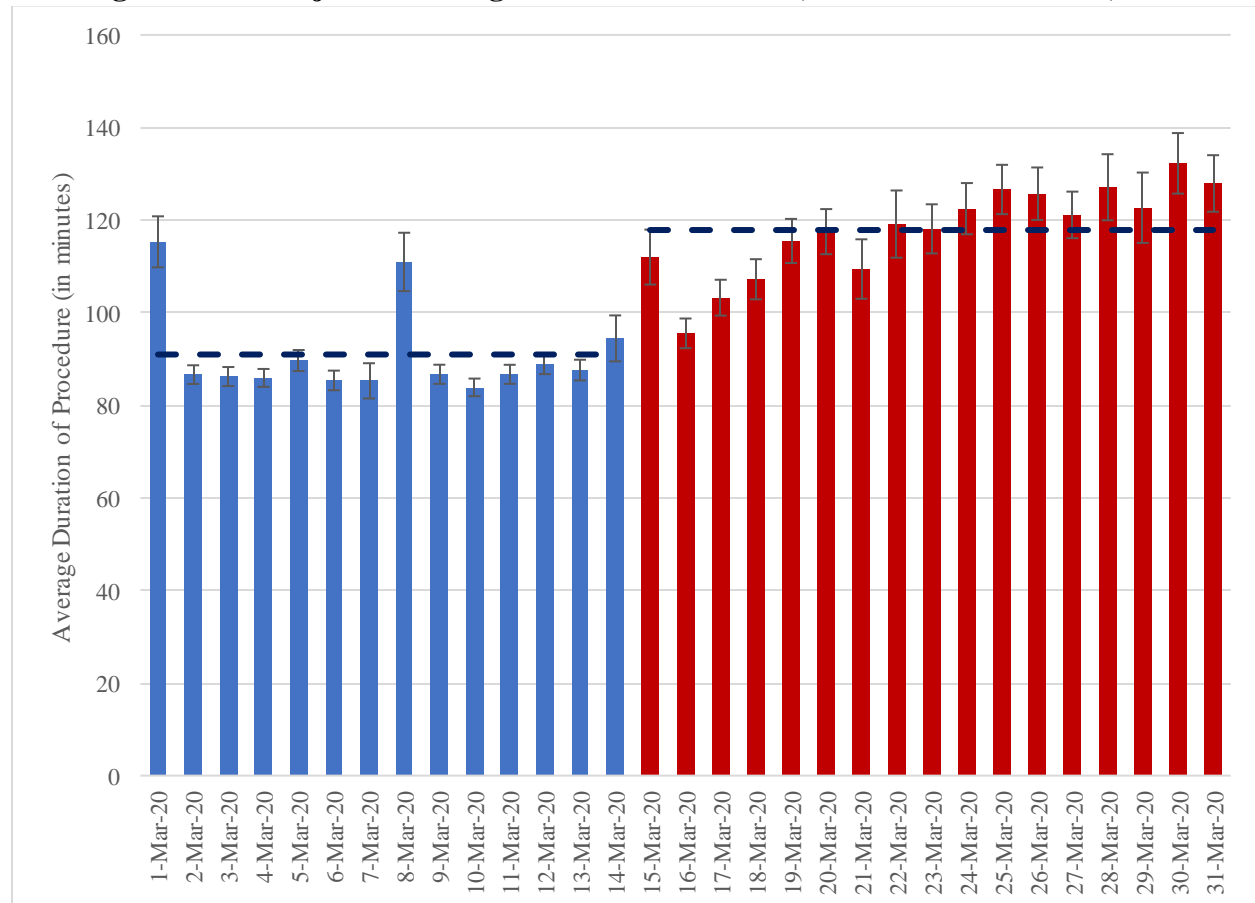

**Table A1. Average Descriptive Statistics**

| Average Stats                                                     | Pre-<br>COVID-19 | COVID-19      |                        |                    |
|-------------------------------------------------------------------|------------------|---------------|------------------------|--------------------|
|                                                                   |                  | Entire Period | Non-elective<br>Period | Elective<br>period |
| Average daily procedures                                          | 3,048            | 1,159         | 751                    | 1,389              |
| Physician age                                                     | 47.5             | 47.1          | 47.4                   | 47.1               |
| Percentage of male physicians                                     | 67.6%            | 68.2%         | 69.3%                  | 68.7%              |
| Physician tenure                                                  | 20.0             | 19.5          | 19.8                   | 19.6               |
| Patient age                                                       | 53.4             | 52.3          | 51.1                   | 52.8               |
| Percentage of male patients                                       | 43.8%            | 40.3%         | 37.3%                  | 41.5%              |
| Patient complexity                                                | 3.9              | 4.3           | 4.6                    | 4.2                |
| Number of procedures<br>performed in hospital by<br>hospital size |                  |               |                        |                    |
| Quartile 1 (smallest)                                             | 214              | 91            | 19                     | 72                 |
| Quartile 2                                                        | 6,395            | 1,691         | 362                    | 1,329              |
| Quartile 3                                                        | 93,123           | 21,720        | 4,870                  | 16,850             |
| Quartile 4 (largest)                                              | 963,953          | 208,102       | 48,828                 | 159,274            |
| Number of procedures<br>performed by region                       |                  |               |                        |                    |
| Central                                                           | 259,539          | 51,186        | 11,365                 | 39,821             |
| East                                                              | 245,898          | 49,860        | 11,132                 | 38,728             |
| North                                                             | 89,598           | 22,653        | 5,690                  | 16,963             |
| Toronto                                                           | 174,015          | 41,811        | 9,886                  | 31,925             |
| West                                                              | 285,208          | 64,596        | 15,757                 | 48,839             |

**Table A2. Unadjusted Differences in Procedure Duration (in minutes)**

|                               | Pre-<br>COVID-19 | COVID-19         |                            |                    | % Difference<br>with pre-COVID-19 |                            |                    |
|-------------------------------|------------------|------------------|----------------------------|--------------------|-----------------------------------|----------------------------|--------------------|
|                               |                  | Entire<br>Period | Non-<br>elective<br>Period | Elective<br>period | Entire<br>Period                  | Non-<br>elective<br>Period | Elective<br>period |
| Overall                       | 87.7             | 110.3            | 121.5                      | 106.9              | 25.8%                             | 38.5%                      | 21.9%              |
| By physician age              |                  |                  |                            |                    |                                   |                            |                    |
| Quartile 1 (youngest)         | 95.7             | 113.7            | 119.5                      | 111.7              | 18.8%                             | 24.9%                      | 16.7%              |
| Quartile 2                    | 89.9             | 112.0            | 122.2                      | 108.7              | 24.6%                             | 35.9%                      | 20.9%              |
| Quartile 3                    | 86.6             | 110.0            | 124.2                      | 105.9              | 27.0%                             | 43.4%                      | 22.3%              |
| Quartile 4 (oldest)           | 83.9             | 106.3            | 119.2                      | 102.6              | 26.7%                             | 42.1%                      | 22.3%              |
| By physician gender           |                  |                  |                            |                    |                                   |                            |                    |
| Male                          | 87.4             | 111.0            | 124.7                      | 107.2              | 27.0%                             | 42.7%                      | 22.7%              |
| Female                        | 88.8             | 108.1            | 114.0                      | 105.8              | 21.7%                             | 28.4%                      | 19.1%              |
| By physician location         |                  |                  |                            |                    |                                   |                            |                    |
| East                          | 85.5             | 107.8            | 118.3                      | 104.8              | 26.1%                             | 38.4%                      | 22.6%              |
| West                          | 88.8             | 111.1            | 126.0                      | 106.3              | 25.1%                             | 41.9%                      | 19.7%              |
| Central                       | 73.4             | 92.6             | 102.0                      | 90.0               | 26.2%                             | 39.0%                      | 22.6%              |
| North                         | 85.5             | 102.3            | 114.0                      | 98.4               | 19.6%                             | 33.3%                      | 15.1%              |
| By patient age                |                  |                  |                            |                    |                                   |                            |                    |
| Quartile 1 (youngest)         | 91.7             | 103.1            | 108.9                      | 100.9              | 12.4%                             | 18.8%                      | 10.0%              |
| Quartile 2                    | 82.6             | 108.3            | 120.3                      | 105.2              | 31.1%                             | 45.6%                      | 27.4%              |
| Quartile 3                    | 84.5             | 114.9            | 132.4                      | 110.3              | 36.0%                             | 56.7%                      | 30.5%              |
| Quartile 4 (oldest)           | 92.5             | 116.4            | 132.9                      | 111.6              | 25.8%                             | 43.7%                      | 20.6%              |
| By patient gender             |                  |                  |                            |                    |                                   |                            |                    |
| Male                          | 87.0             | 112.8            | 128.0                      | 108.6              | 29.7%                             | 47.1%                      | 24.8%              |
| Female                        | 88.3             | 108.5            | 117.6                      | 105.5              | 22.9%                             | 33.2%                      | 19.5%              |
| By patient complexity         |                  |                  |                            |                    |                                   |                            |                    |
| Quartile 1 (least<br>complex) | 80.6             | 109.0            | 121.0                      | 105.3              | 35.2%                             | 50.1%                      | 30.6%              |
| Quartile 2                    | 83.5             | 108.4            | 120.5                      | 105.1              | 29.8%                             | 44.3%                      | 25.9%              |
| Quartile 3                    | 87.8             | 107.9            | 117.0                      | 105.1              | 22.9%                             | 33.3%                      | 19.7%              |
| Quartile 4 (most<br>complex)  | 96.9             | 114.5            | 126.0                      | 110.8              | 18.2%                             | 30.0%                      | 14.3%              |
| By hospital size              |                  |                  |                            |                    |                                   |                            |                    |
| Quartile 1 (smallest)         | 104.9            | 113.8            | 107.6                      | 115.4              | 8.5%                              | 2.6%                       | 10.0%              |
| Quartile 2                    | 83.2             | 94.6             | 104.3                      | 92.0               | 13.7%                             | 25.4%                      | 10.6%              |
| Quartile 3                    | 80.8             | 97.7             | 107.5                      | 94.9               | 20.9%                             | 33.0%                      | 17.5%              |
| Quartile 4 (largest)          | 88.4             | 111.7            | 123.0                      | 108.3              | 26.4%                             | 39.1%                      | 22.5%              |

Notes: Pre-COVID-19 period includes procedures performed April 1, 2019 to March 14, 2020. Non-elective COVID-19 period includes procedures performed March 15, 2020 to May 25, 2020. Elective COVID-19 period

Appendix 1 to Kantarevic J, Chami N, Vinden C, et al. COVID-19 and the duration of operating room procedures in Ontario: a population-based retrospective study. *Can J Surg* 2022. Copyright © 2022 The Author(s) or their employer(s). To receive this resource in an accessible format, please contact us at [cmajgroup@cmaj.ca](mailto:cmajgroup@cmaj.ca).

doi: 10.1503/cjs.011521

*Online appendices are unedited and posted as supplied by the authors.*

includes procedures performed May 26, 2020 to September 20, 2020. \* p-value<0.1, \*\* p-value<0.05, \*\*\*p-value<0.01

**Table A3. Multivariate Regression Results Across Entire Period**

|                             | Model 1             | Model 2              | Model 3               | Model 4               | Model 5               |
|-----------------------------|---------------------|----------------------|-----------------------|-----------------------|-----------------------|
| <b>COVID-19</b>             | 22.56***<br>(0.163) | 6.408***<br>(0.0935) | 6.687***<br>(0.104)   | 6.687***<br>(0.106)   | 6.678***<br>(0.106)   |
| <b>Physician age</b>        |                     |                      |                       |                       |                       |
| Quartile 1 (youngest)       |                     |                      |                       |                       |                       |
| Quartile 2                  |                     |                      | -3.354***<br>(0.118)  | -3.365***<br>(0.120)  | -3.343***<br>(0.120)  |
| Quartile 3                  |                     |                      | -4.359***<br>(0.114)  | -4.292***<br>(0.116)  | -4.227***<br>(0.116)  |
| Quartile 4 (oldest)         |                     |                      | -4.848***<br>(0.115)  | -4.820***<br>(0.117)  | -4.755***<br>(0.117)  |
| <b>Physician gender</b>     |                     |                      |                       |                       |                       |
| Female (reference)          |                     |                      |                       |                       |                       |
| Male                        |                     |                      | -5.506***<br>(0.0981) | -5.608***<br>(0.0998) | -5.614***<br>(0.0998) |
| <b>Physician location</b>   |                     |                      |                       |                       |                       |
| Central Ontario (reference) |                     |                      |                       |                       |                       |
| East Ontario                |                     |                      | 3.762***<br>(0.107)   | 3.757***<br>(0.109)   | 3.665***<br>(0.109)   |
| North Ontario               |                     |                      | -1.570***<br>(0.145)  | -1.744***<br>(0.148)  | -2.040***<br>(0.150)  |
| West Ontario                |                     |                      | 1.332***<br>(0.104)   | 1.224***<br>(0.106)   | 1.112***<br>(0.106)   |
| <b>Patient age</b>          |                     |                      |                       |                       |                       |
| Quartile 1 (reference)      |                     |                      |                       |                       |                       |
| Quartile 2                  |                     |                      |                       | -1.202***<br>(0.124)  | -1.201***<br>(0.124)  |
| Quartile 3                  |                     |                      |                       | -0.854***<br>(0.132)  | -0.869***<br>(0.132)  |
| Quartile 4 (oldest)         |                     |                      |                       | -1.087***<br>(0.135)  | -1.115***<br>(0.135)  |
| <b>Patient gender</b>       |                     |                      |                       |                       |                       |
| Female (reference)          |                     |                      |                       |                       |                       |
| Male                        |                     |                      |                       | 2.314***<br>(0.0834)  | 2.318***<br>(0.0834)  |
| <b>Patient complexity</b>   |                     |                      |                       |                       |                       |
| Quartile 1 (reference)      |                     |                      |                       |                       |                       |
| Quartile 2                  |                     |                      |                       | 0.321**               | 0.322**               |

|                              |           |           |           |           |
|------------------------------|-----------|-----------|-----------|-----------|
|                              |           |           | (0.108)   | (0.108)   |
| Quartile 3                   |           |           | 0.949***  | 0.949***  |
|                              |           |           | (0.109)   | (0.109)   |
| Quartile 4 (most complex)    |           |           | 3.865***  | 3.859***  |
|                              |           |           | (0.108)   | (0.108)   |
| <b>Hospital size</b>         |           |           |           |           |
| Quartile 1 (reference)       |           |           |           |           |
| Quartile 2                   |           |           |           | -7.606**  |
|                              |           |           |           | (2.551)   |
| Quartile 3                   |           |           |           | -4.487    |
|                              |           |           |           | (2.513)   |
| Quartile 4 (largest)         |           |           |           | -6.143*   |
|                              |           |           |           | (2.511)   |
| Fee code fixed effects       | No        | Yes       | Yes       | Yes       |
| OHIP Specialty fixed Effects | No        | No        | Yes       | Yes       |
| Month of Year Fixed Effects  | No        | No        | Yes       | Yes       |
| Sample Size                  | 1,295,509 | 1,295,509 | 1,196,418 | 1,149,378 |
| Adjusted R <sup>2</sup>      | 0.015     | 0.695     | 0.701     | 0.701     |

Note: The outcome variable is procedure duration in minutes. Standard errors in parentheses.

\* p<0.05, \*\* p<0.01, \*\*\* p<0.001

**Table A4. Multivariate Regression: Fee Codes in Non-elective COVID-19 Period**

| Sample restriction                                          | Sample Size | COVID-19    |                | COVID-19 non-elective period |                | Adjusted R <sup>2</sup> |
|-------------------------------------------------------------|-------------|-------------|----------------|------------------------------|----------------|-------------------------|
|                                                             |             | Coefficient | Standard Error | Coefficient                  | Standard Error |                         |
| <i>No Interaction Term for Non-elective COVID-19 Period</i> |             |             |                |                              |                |                         |
| Main                                                        | 1,149,170   | 6.678***    | (0.106)        |                              |                | 0.701                   |
| Non-elective fee codes in all periods                       | 1,135,447   | 6.708***    | (0.106)        |                              |                | 0.701                   |
| <i>Interaction Term for Non-elective COVID-19 Period</i>    |             |             |                |                              |                |                         |
| Main                                                        | 1,149,170   | 4.676***    | (0.122)        | 7.692***                     | (0.230)        | 0.701                   |
| Non-elective fee codes in all periods                       | 1,135,447   | 4.684***    | (0.122)        | 7.716***                     | (0.230)        | 0.702                   |

*Notes:* The outcome variable is procedure duration in minutes. Each model includes fee code fixed effects, controls for characteristics of physicians (age, sex, OHIP specialty and region), patients (age, sex, complexity), and hospitals (size), and monthly fixed effects. \* p<0.05, \*\* p<0.01, \*\*\* p<0.001

doi: 10.1503/cjs.011521

*Online appendices are unedited and posted as supplied by the authors.*

### **Anaesthesiologists' Services: Extra Units**

An amount is paid when extra units are billed along with the basic unit when an anaesthesiologist administers an anaesthetic to:

|       |                                                                                                                                                 |          |
|-------|-------------------------------------------------------------------------------------------------------------------------------------------------|----------|
| E022C | ASA III -patient with severe systemic disease limiting activity but not incapacitating                                                          | 2 units  |
| E017C | ASA IV – patient with incapacitating systemic disease that is a constant threat to life                                                         | 10 units |
| E016C | ASA V – moribund patient not expected to live 24 hours <i>with or without</i> operation                                                         | 20 units |
| E020C | ASA E -patient undergoing anaesthesia for emergency surgery which commences within 24 hours of operating room booking, to E022C, E017C or E016C | 4 units  |

From: OHIP Schedule of Benefits 2020. Available at:

[http://www.health.gov.on.ca/en/pro/programs/ohip/sob/physserv/sob\\_master20200306.pdf](http://www.health.gov.on.ca/en/pro/programs/ohip/sob/physserv/sob_master20200306.pdf)



**Table A5. Sensitivity Analysis: Sample Restrictions**

| Sample restriction                                                            | Sample Size | COVID-19    |                | COVID-19 non-elective period |                | Adjusted R <sup>2</sup> |
|-------------------------------------------------------------------------------|-------------|-------------|----------------|------------------------------|----------------|-------------------------|
|                                                                               |             | Coefficient | Standard Error | Coefficient                  | Standard Error |                         |
| <i>Procedure and Patient Restrictions</i>                                     |             |             |                |                              |                |                         |
| Restriction 1                                                                 | 585,302     | 5.303***    | (0.192)        | 8.744***                     | (0.348)        | 0.697                   |
| Restriction 2                                                                 | 144,292     | 4.281***    | (0.366)        | 9.737***                     | (0.601)        | 0.647                   |
| Restriction 3                                                                 | 157,922     | 2.631***    | (0.318)        | 6.522***                     | (0.523)        | 0.609                   |
| Restriction 4                                                                 | 89,353      | 2.026***    | (0.423)        | 6.900***                     | (0.693)        | 0.656                   |
| Restrictions 1, 2, 3 or 4                                                     | 677,236     | 4.864***    | (0.170)        | 7.601***                     | (0.305)        | 0.694                   |
| <i>Physician and Hospital Restrictions (pre-COVID-19 and COVID-19 period)</i> |             |             |                |                              |                |                         |
| Same group of physicians                                                      | 1,118,802   | 4.681***    | (0.122)        | 7.797***                     | (0.231)        | 0.703                   |
| Same group of hospitals                                                       | 1,147,490   | 4.691***    | (0.122)        | 7.691***                     | (0.231)        | 0.701                   |
| Same group of physicians and hospitals                                        | 1,117,457   | 4.698***    | (0.122)        | 7.795***                     | (0.231)        | 0.703                   |

*Notes:* The outcome variable is procedure duration in minutes. Each model includes fee code fixed effects, controls for characteristics of physicians (age, sex, OHIP specialty and region), patients (age, sex, complexity), and hospitals (size), and monthly fixed effects. Restriction 1 = surgeries billed in conjunction with fee code E020 (ASA III), fee code E017 (ASA IV), fee code E022 (ASAV), fee code E016 (ASA E), and trauma surgeries (fee code E420). Restriction 2 = surgeries on patients who had emergency department visits within a week prior to the surgery. Restriction 3 = surgeries performed in evenings or nights. Restriction 4 = surgeries performed on weekends and holidays. \* p<0.05, \*\* p<0.01, \*\*\* p<0.001

**Table A6. Sensitivity to the Definition of Start Date for COVID-19**

| Sample Period                            | “Start date of COVID” | COVID-19 Coefficient | Standard Error |
|------------------------------------------|-----------------------|----------------------|----------------|
| <i>Alternate Start Dates of COVID-19</i> |                       |                      |                |
| April 1, 2019 – September 30, 2020       | March 10, 2020        | 5.933                | 0.0949         |
| April 1, 2019 – September 30, 2020       | March 22, 2020        | 6.4290               | 0.0993         |
| April 1, 2019 – September 30, 2020       | April 1, 2020         | 6.1370               | 0.1004         |
| <i>Falsification Experiment</i>          |                       |                      |                |
| April 1, 2019 – March 15, 2020           | July 1, 2019          | 0.7035               | 0.0865         |
| April 1, 2019 – March 15, 2020           | October 1, 2019       | 0.1663               | 0.0773         |
| April 1, 2019 – March 15, 2020           | January 1, 2020       | -0.1114              | 0.0934         |

*Notes:* The outcome variable is procedure duration in minutes. Each model includes fee code fixed effects, controls for characteristics of physicians (age, sex, OHIP specialty and region), patients (age, sex, complexity), and hospitals (size).

**Table A7. Multivariate Regression with COVID-19 Month Variables**

|                                         | Model (1)            | Model (2)            | Model (3)             | Model (4)             | Model (5)             |
|-----------------------------------------|----------------------|----------------------|-----------------------|-----------------------|-----------------------|
| <b>COVID-19</b>                         | 26.96***<br>(0.571)  | 8.335***<br>(0.320)  | 8.728***<br>(0.377)   | 8.723***<br>(0.383)   | 8.708***<br>(0.383)   |
| <b>COVID-19 Month Indicators (2020)</b> |                      |                      |                       |                       |                       |
| March (reference)                       |                      |                      |                       |                       |                       |
| April                                   | 13.33***<br>(0.768)  | 6.089***<br>(0.429)  | 6.402***<br>(0.497)   | 6.416***<br>(0.504)   | 6.410***<br>(0.504)   |
| May                                     | 5.960***<br>(0.720)  | 3.846***<br>(0.401)  | 4.275***<br>(0.471)   | 4.291***<br>(0.479)   | 4.305***<br>(0.479)   |
| June                                    | -2.990***<br>(0.664) | -0.424<br>(0.370)    | -0.519<br>(0.445)     | -0.552<br>(0.453)     | -0.557<br>(0.453)     |
| July                                    | -8.257***<br>(0.644) | -3.364***<br>(0.360) | -3.951***<br>(0.437)  | -4.041***<br>(0.444)  | -4.003***<br>(0.444)  |
| August                                  | -10.34***<br>(0.653) | -5.298***<br>(0.365) | -6.555***<br>(0.443)  | -6.512***<br>(0.451)  | -6.503***<br>(0.451)  |
| September                               | -12.65***<br>(0.707) | -6.592***<br>(0.395) | -7.354***<br>(0.468)  | -7.288***<br>(0.476)  | -7.323***<br>(0.476)  |
| <b>Physician Gender</b>                 |                      |                      |                       |                       |                       |
| Female (reference)                      |                      |                      |                       |                       |                       |
| Male                                    |                      |                      | -5.506***<br>(0.0980) | -5.608***<br>(0.0997) | -5.614***<br>(0.0997) |
| <b>Physician Age</b>                    |                      |                      |                       |                       |                       |
| Quartile 1 (reference)                  |                      |                      |                       |                       |                       |
| Quartile 2                              |                      |                      | -3.343***<br>(0.117)  | -3.354***<br>(0.119)  | -3.333***<br>(0.120)  |
| Quartile 3                              |                      |                      | -4.324***<br>(0.114)  | -4.257***<br>(0.116)  | -4.192***<br>(0.116)  |
| Quartile 4 (oldest)                     |                      |                      | -4.805***<br>(0.115)  | -4.777***<br>(0.117)  | -4.712***<br>(0.117)  |
| <b>Physician location</b>               |                      |                      |                       |                       |                       |
| Central Ontario (reference)             |                      |                      |                       |                       |                       |
| East Ontario                            |                      |                      | 3.733***<br>(0.106)   | 3.729***<br>(0.109)   | 3.637***<br>(0.109)   |
| North Ontario                           |                      |                      | -1.636***<br>(0.145)  | -1.809***<br>(0.148)  | -2.104***<br>(0.150)  |
| West Ontario                            |                      |                      | 1.269***<br>(0.104)   | 1.161***<br>(0.106)   | 1.049***<br>(0.106)   |
| <b>Patient Gender</b>                   |                      |                      |                       |                       |                       |
| Female (reference)                      |                      |                      |                       |                       |                       |
| Male                                    |                      |                      |                       | 2.303***              | 2.306***              |

|                              |           |           |           |           |           |
|------------------------------|-----------|-----------|-----------|-----------|-----------|
|                              |           |           |           | (0.0834)  | (0.0834)  |
| <b>Patient Age</b>           |           |           |           |           |           |
| Quartile 1 (reference)       |           |           |           |           |           |
| Quartile 2                   |           |           |           | -1.194*** | -1.193*** |
|                              |           |           |           | (0.124)   | (0.124)   |
| Quartile 3                   |           |           |           | -0.859*** | -0.874*** |
|                              |           |           |           | (0.131)   | (0.131)   |
| Quartile 4 (oldest)          |           |           |           | -1.099*** | -1.127*** |
|                              |           |           |           | (0.135)   | (0.135)   |
| <b>Patient Complexity</b>    |           |           |           |           |           |
| Quartile 1 (reference)       |           |           |           |           |           |
| Quartile 2                   |           |           |           | 0.355**   | 0.357***  |
|                              |           |           |           | (0.108)   | (0.108)   |
| Quartile 3                   |           |           |           | 0.987***  | 0.986***  |
|                              |           |           |           | (0.109)   | (0.109)   |
| Quartile 4 (most complex)    |           |           |           | 3.900***  | 3.894***  |
|                              |           |           |           | (0.108)   | (0.108)   |
| <b>Hospital Size</b>         |           |           |           |           |           |
| Quartile 1 (reference)       |           |           |           |           |           |
| Quartile 2                   |           |           |           |           | -7.711**  |
|                              |           |           |           |           | (2.549)   |
| Quartile 3                   |           |           |           |           | -4.654    |
|                              |           |           |           |           | (2.511)   |
| Quartile 4 (largest)         |           |           |           |           | -6.309*   |
|                              |           |           |           |           | (2.509)   |
| Fee code fixed effects       | No        | Yes       | Yes       | Yes       | Yes       |
| OHIP Specialty fixed Effects | No        | No        | Yes       | Yes       | Yes       |
| Month of Year Fixed Effects  | No        | No        | Yes       | Yes       | Yes       |
| Sample Size                  | 1,295,509 | 1,295,509 | 1,196,418 | 1,149,378 | 1,149,170 |
| Adjusted R <sup>2</sup>      | 0.017     | 0.696     | 0.702     | 0.701     | 0.701     |

Note: The outcome variable is procedure duration in minutes. Standard errors in parentheses.

\* p<0.05, \*\* p<0.01, \*\*\* p<0.001

doi: 10.1503/cjs.011521

Online appendices are unedited and posted as supplied by the authors.

**Table A8. Multivariate Regression by Surgical Time Quartiles**

| Sample restriction         | Sample Size | COVID-19    |                | COVID-19 non-elective period |                | Adjusted R <sup>2</sup> |
|----------------------------|-------------|-------------|----------------|------------------------------|----------------|-------------------------|
|                            |             | Coefficient | Standard Error | Coefficient                  | Standard Error |                         |
| Surgical Time Quartiles    |             |             |                |                              |                |                         |
| Quartile 1 (shortest time) | 608,900     | 4.234       | 0.114          | 7.597                        | 0.235          | 0.418                   |
| Quartile 2                 | 232,461     | 5.418       | 0.240          | 8.407                        | 0.437          | 0.315                   |
| Quartile 3                 | 172,880     | 5.482       | 0.353          | 5.608                        | 0.616          | 0.504                   |
| Quartile 4 (longest time)  | 134,929     | 3.257       | 0.591          | 11.544                       | 1.131          | 0.502                   |

*Notes:* The outcome variable is procedure duration in minutes. The time quartiles are based on the duration of procedures in the pre-COVID-19 period. Each model includes fee code fixed effects, controls for characteristics of physicians (age, sex, OHIP specialty and region), patients (age, sex, complexity), and hospitals (size), and monthly fixed effects. All coefficients in the table are significant at the 1% level.

**Table A9. Impact of COVID-19 on Anaesthesia Time Units – Multivariate Regression**

|                                     | Model (1)          | Model (2)          | Model (3)          | Model (4)          | Model (5)          |
|-------------------------------------|--------------------|--------------------|--------------------|--------------------|--------------------|
| <b>COVID-19</b>                     | 2.96***<br>(0.033) | 0.81***<br>(0.019) | 0.79***<br>(0.022) | 0.79***<br>(0.023) | 0.79***<br>(0.023) |
| <b>COVID-19 non-elective period</b> | 2.59***<br>(0.062) | 1.22***<br>(0.037) | 1.35***<br>(0.042) | 1.36***<br>(0.043) | 1.36***<br>(0.043) |
| Fee code fixed effects              | No                 | Yes                | Yes                | Yes                | Yes                |
| OHIP Specialty fixed Effects        | No                 | No                 | Yes                | Yes                | Yes                |
| Month of Year Fixed Effects         | No                 | No                 | Yes                | Yes                | Yes                |
| Sample Size                         | 1, 291,866         | 1, 291,866         | 1, 193,019         | 1, 146,076         | 1, 145,869         |
| Adjusted R <sup>2</sup>             | 0.013              | 0.669              | 0.674              | 0.673              | 0.673              |

Note: The outcome variable is anaesthesia time in units. Standard errors are in parentheses. Model (3) controls for physician characteristics only (age, gender, and geographical location). Model (4) controls for physician and patient characteristics (age, gender, and complexity). Model (5) controls for physician, patient, and hospital characteristics (hospital size).

\* p<0.05, \*\* p<0.01, \*\*\* p<0.001

**Table A10. Multivariate Regression by Specialty Procedure Type**

| Type of Procedure                                                        | Sample Size | COVID-19    |                | COVID-19 non-elective period |                | Adjusted R <sup>2</sup> |
|--------------------------------------------------------------------------|-------------|-------------|----------------|------------------------------|----------------|-------------------------|
|                                                                          |             | Coefficient | Standard Error | Coefficient                  | Standard Error |                         |
| Cardiovascular Surgical Procedures                                       | 23,039      | 6.578       | 1.412          | 4.898                        | 2.388          | 0.589                   |
| Clinical Procedures associated with Diagnostic Radiological Examinations | 2,457       | 8.255       | 4.355          | <b>6.737</b>                 | 7.573          | 0.318                   |
| Diagnostic and Therapeutic Procedures                                    | 20,237      | 2.510       | 0.991          | 4.638                        | 1.671          | 0.754                   |
| Digestive System Surgical Procedures                                     | 526,952     | 3.743       | 0.151          | 12.579                       | 0.318          | 0.736                   |
| Endocrine Surgical Procedures                                            | 6,617       | 9.397       | 1.774          | 6.412                        | 3.432          | 0.281                   |
| Female Genital Surgical Procedures                                       | 68,681      | 7.300       | 0.495          | 10.539                       | 1.031          | 0.666                   |
| Haematic and Lymphatic Surgical Procedures                               | 9,631       | 10.939      | 2.232          | 11.830                       | 3.572          | 0.517                   |
| Integumentary System Surgical Procedures                                 | 33,312      | 7.244       | 0.849          | 3.673                        | 1.572          | 0.596                   |
| Male Genital Surgical Procedures                                         | 23,193      | 6.456       | 0.746          | 5.289                        | 1.621          | 0.671                   |
| Musculoskeletal System Surgical Procedures                               | 160,196     | 2.249       | 0.346          | 11.401                       | 0.690          | 0.517                   |
| Neurological Surgical Procedures                                         | 20,105      | 13.200      | 1.726          | <b>0.868</b>                 | 2.898          | 0.652                   |
| Obstetrics                                                               | 90,677      | 1.404       | 0.224          | 1.030                        | 0.356          | 0.071                   |
| Ocular and Aural Surgical Procedures                                     | 55,329      | 4.801       | 0.439          | 12.639                       | 1.105          | 0.564                   |
| Respiratory Surgical Procedures                                          | 27,197      | 7.856       | 0.885          | 10.260                       | 1.824          | 0.413                   |
| Spinal Surgical Procedures                                               | 12,093      | 8.001       | 2.284          | 13.248                       | 4.463          | 0.359                   |
| Urogenital and Urinary Surgical Procedures                               | 53,810      | 9.517       | 0.528          | 7.802                        | 0.964          | 0.680                   |

Notes: The outcome variable is procedure duration in minutes. Coefficients in bold are not significant at the 10% level. Each model includes fee code fixed effects, controls for characteristics of physicians (age, sex, OHIP specialty and region), patients (age, sex, complexity), and hospitals (size), and monthly fixed effects.

### *CIHI Pop Grouper*

Patient-level clinical complexity was derived from the CIHI Population Grouping Methodology (known as the CIHI Pop Grouper) by processing physician billings data from OHIP claims, hospital discharge records from CIHI's Discharge Abstract Database (DAD), and emergency department and outpatient clinic records from CIHI's National Ambulatory Care Reporting System (NACRS) (Li et al. 2019). The CIHI Pop Grouper builds clinical and demographic profiles for each person in the Ontario population, including health system non-users. The clinical profile summarizes all health conditions identified from inpatient, day surgery, emergency department, and physician claims administrative data over a pre-specified lookback period. The demographic profile comprises age and sex information captured for all persons eligible to receive publicly funded health services in Ontario. These profiles may be used to explain current period costs and predict person-level health care resource utilization needs one year into the future. In this study, we used the indicators for current and expected future costs to the health system in Ontario. These indicators were calculated using the claims data for fiscal year (FY) 2018-19 as the current period (which uses a five-year baseline or lookback period to construct clinical and demographic profiles) to explain current period relative resource utilization and predict relative resource utilization for FY2019-20.

### **References:**

Li Y, Weir S, Steffler M, Shaikh S, Wright JG, Kantarevic J. Using Diagnoses to Estimate Health Care Cost Risk in Canada. *Medical Care*. 2019 Nov;57(11):875–881.



### *Multivariate Regression Analysis*

Our baseline regression model can be expressed as

$$y_{it} = \alpha + \beta_1 COVID_t + \beta_2 Nonelective_t + \gamma_i + \delta_t + X_{it} + \varepsilon_{it}$$

where  $y_{it}$  is the average duration for procedure  $i$  at time  $t$ ,  $COVID=1$  for dates post March 15, 2020 and =0 otherwise,  $Nonelective$  is a dummy variable which equals 1 for dates between (and including) March 15, 2020 and May 25, 2020,  $\gamma$  is the fixed fee code effect,  $\delta$  is the fixed month effect, and  $X$  includes a set of physician, patient and hospital characteristics.

doi: 10.1503/cjs.011521

*Online appendices are unedited and posted as supplied by the authors.*

Patient and procedure restriction criteria based on fee codes billed in conjunction with main procedure fee code that generate additional payment when an anaesthesiologist administers an anaesthetic to:

| Fee Code | Description                                                                             |
|----------|-----------------------------------------------------------------------------------------|
| E016     | Moribund patients not expected to live 24 hours with or without operation               |
| E017     | Patients with incapacitating systemic disease that constitute a constant threat to life |
| E020     | Patients undergoing emergency procedure commencing within 24 hours of OR booking        |
| E022     | Patients with severe systemic disease limiting activity                                 |

Source: [http://www.health.gov.on.ca/en/pro/programs/ohip/sob/physerv/sob\\_master20200306.pdf](http://www.health.gov.on.ca/en/pro/programs/ohip/sob/physerv/sob_master20200306.pdf)
